# Supplementary material for: OsYSL13 Is Involved in Iron Distribution in Rice
Source: Int J Mol Sci. 2018 Nov 9;19(11):3537. doi: 10.3390/ijms19113537 (PMC6274735; doi:10.3390/ijms19113537)
Supplement: Supplementary file 1 [file ijms-19-03537-s001.pdf]

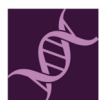

Supplementary Materials:

**Table S1.** Primers used in this paper.

| Purpose                                                | Name   | Sequences                          |
|--------------------------------------------------------|--------|------------------------------------|
| T-DNA insertion line genotyping                        | T U    | GACGTGGAGATGGTGGAGG                |
|                                                        | T L    | CAGCAGCGAAATTGATGGA                |
|                                                        | NL     | AATCCAGATCCCCGAATTA                |
| Complementation Test                                   | C U    | GGGGACAAGTTTGTACAAAAAAGCAGGCTTGCC  |
|                                                        |        | AGTTGCAAGTATTGATC                  |
|                                                        | C L    | GGGGACCACTTTGTACAAGAAAGCTGGGTCTCA  |
|                                                        |        | AGCATATGTCTTCTAC                   |
| Generation of <i>OsYSL13</i> overexpression lines      | OX U   | GGGGACAAGTTTGTACAAAAAAGCAGGCTATGG  |
|                                                        |        | CGACCGTTCCTACGCC                   |
|                                                        | OX L   | GGGGACCACTTTGTACAAGAAAGCTGGGTTTATT |
| mRNA expression identification of T-DNA insertion line | I U    | TTCCCAATGTTGTAA                    |
|                                                        |        | ATGGCGACCGTTCCTACGCC               |
|                                                        |        | TTATTTTCCCAATGTTGTAA               |
| Quantitative real-time PCR                             | Q 13 U | CGGGTCTTCATAGCCATTGCC              |
|                                                        | Q 13 L | CGCTCCTCGTCGTATGAGACA              |
|                                                        | Q 16 U | TTGCTCCCTCTCCGAAAGGTG              |
|                                                        | Q 16 L | GCGTGTGAAACCCGTTTATGA              |
|                                                        | Q A U  | AGACCTTCAACACCCCTGCT               |
|                                                        | Q A L  | GTCCCTCACAATTCCCGCT                |
|                                                        | S U    | CACTCACGGCATGGACGAGCTGTACAAGATGGC  |
|                                                        |        | GACCGTTCCTACGCC                    |
| Subcellular localization                               | S L    | TGAACGATCTGCAGCCGGGCGGCCGCTTATTTTC |
|                                                        |        | CCAATGTTGTAA                       |

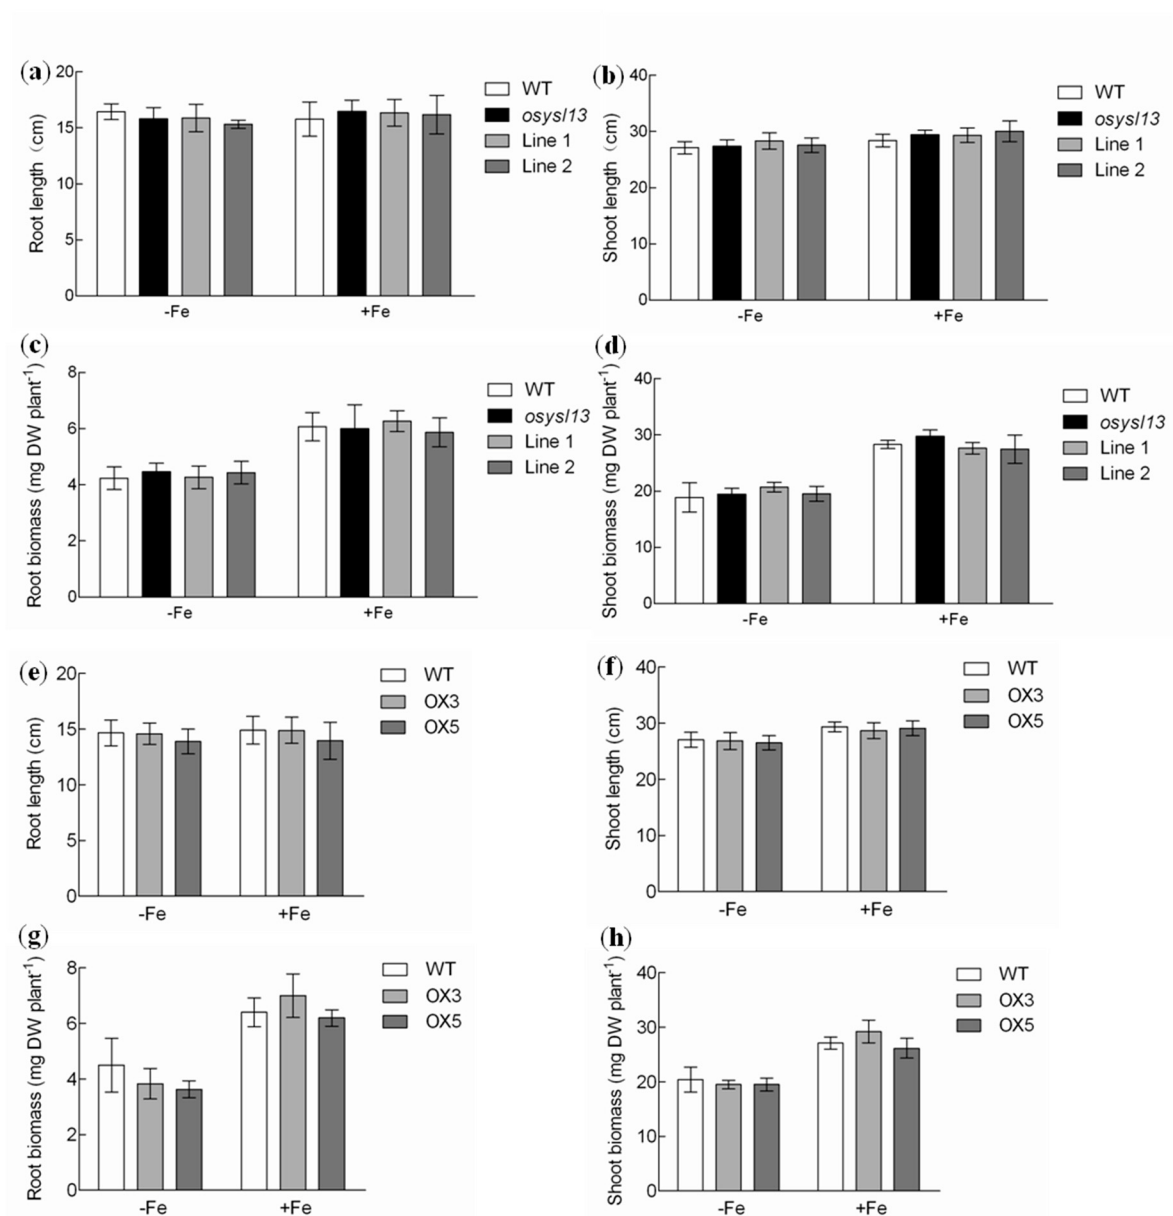

**Figures S1.** Plants growth during Fe deficiency and sufficiency. (a-d) The length of the roots (a) and shoots (b), and the biomass of the roots (c) and shoots (d) in the *osysl13* mutant, wild type and complementation lines. (e-h) The length of the roots (e) and shoots (f), and the biomass of the roots (g) and shoots (h) in the *OsYSL13* overexpression lines and wild type. Plant materials, including *osysl13* mutant, *OsYSL13* overexpression lines, their corresponding wild type and complementation lines, were grown in nutrient solution with or without Fe for 10 days. Significant differences compared with the wild type were determined by ANOVA ( $P < 0.05$ ). Data were shown as means  $\pm$  SD ( $n=3$ ). DW, dry weight.

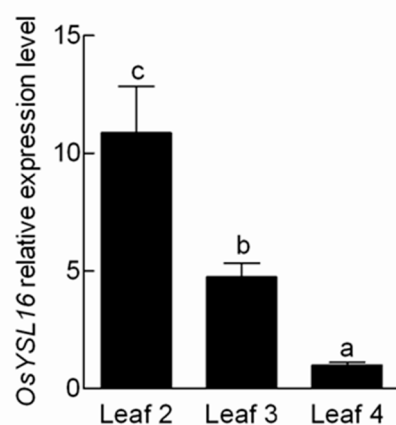

**Figures S2.** Expression of *OsYSL16* in different leaves. Plants were cultured in normal nutrient solution for 7 days. The leaf 4 was the newest unfully expanded leaf. Different leaves (from leaf 2 to 4) were sampled for analysis. Relative expression level of *OsYSL16* was compared with the expression in the leaf 4. The expression was determined by quantitative RT-PCR. *OsActin1* was used as an internal control. Data were means  $\pm$  SD (n=3). Means with different letters were significantly different. ANOVA with a subsequent Duncan's test was performed ( $P < 0.05$ ).
